# Supplementary material for: Latest in Resuscitation Research: Highlights From the 2021 American Heart Association's Resuscitation Science Symposium
Source: PubMed Central journal article supplement — J Am Heart Assoc. 2022 Sep 29;11(19):e026191. doi: 10.1161/JAHA.122.026191 (PMC9673691; doi:10.1161/jaha.122.026191), 2022-09-29
Supplement: JAH3-11-e026191-s001.pdf [file JAH3-11-e026191-s001.pdf]

# **Supplemental Material**

**Table S1. ReSS 2021 Young Investigator Awards.**

| <b>Name</b>           | <b>Abstract Title</b>                                                                                                                                                                                                                                                    |
|-----------------------|--------------------------------------------------------------------------------------------------------------------------------------------------------------------------------------------------------------------------------------------------------------------------|
| Afrah Ali             | Simulation Based Assessment of Trainee's Performance in Post-Cardiac Arrest Resuscitation                                                                                                                                                                                |
| Tomoaki Aoki          | Normoxic Therapy Attenuated Oxidative Stress Related mRNA Gene Expressions in a Post-Cardiac Arrest Rat Model                                                                                                                                                            |
| Matthew Barajas       | Intravenous Waveform Analysis Correlates With Volume Status in Resuscitation in In-Vivo Rat Model                                                                                                                                                                        |
| Frederick Brown       | Antiarrhythmic Use and the Posterior Probability of Neurologically Intact Survival in a Reanalysis of the Amiodarone, Lidocaine or Placebo Study in Out-of-Hospital Cardiac Arrest                                                                                       |
| Alexis Cole           | The Safety and Tolerability of Prolonged Inhalation of Hydrogen Gas in Air: A Phase I Clinical Trial                                                                                                                                                                     |
| Ruben Crespo          | Determinants of Stabilization for Out-of-Hospital Cardiac Arrest Patients Undergoing Extracorporeal Cardiopulmonary Resuscitation                                                                                                                                        |
| Yusuke Endo           | Tissue-to-Arterial Carbon Dioxide Partial Pressure Gradient as a Useful Measure for Monitoring Tissue Perfusion in a Pig Model of Hemorrhagic Shock and Resuscitation                                                                                                    |
| Katharyn L Flickinger | Rehabilitation Reduces Depression After Cardiac Arrest                                                                                                                                                                                                                   |
| R. Angel Garcia       | Variation in Out-of-Hospital Cardiac Arrest Survival Across EMS Agencies                                                                                                                                                                                                 |
| Brian Haskins         | Long-Term Functional and Quality-of-Life Outcomes of Cardiac Arrest Survivors Stratified by Shock Provider: A 10 Year Retrospective Study                                                                                                                                |
| Toshihiro Hatakeyama  | Pre-hospital Physician's Presence and Neurological Outcome Among Patients Performed Pre-hospital Advanced Airway Management: A Nationwide Multicenter Observational Study in Japan (the Japanese Association for Acute Medicine-out-of-Hospital Cardiac Arrest Registry) |
| Ryan Huebinger        | Time to Anti-Arrhythmic for Out-of-Hospital Cardiac Arrest                                                                                                                                                                                                               |
| Changshin Kang        | A New Window on a Cerebral Penumbra at Risk for a Secondary Ischemic Brain Injury in Post-Cardiac Arrest Patients                                                                                                                                                        |
| Shaveta Khosla        | Rise in Out-of-Hospital Cardiac Arrest Cases in Chicago in 2020                                                                                                                                                                                                          |
| Shengyuan Luo         | Early Compared to Late Administration of Epinephrine in Adults With Shockable Initial Rhythm Out-of-Hospital Cardiac Arrest                                                                                                                                              |
| Aurora Magliocca      | Modulation of Kynurenine Pathway to Prevent Brain Injury After Cardiac Arrest and Cardiopulmonary Resuscitation in Mice                                                                                                                                                  |
| Oscar Mitchell        | Use of a QR Code Accessed Debrief Tool is Associated With Higher Rates of Debrief After In-Hospital Cardiac Arrest                                                                                                                                                       |
| Sivagowry Moerk       | Signs of Life as a Predictor of Survival in Patients With Out-of-Hospital Cardiac Arrest and Long Low-Flow Times                                                                                                                                                         |

|                   |                                                                                                                                                                                |
|-------------------|--------------------------------------------------------------------------------------------------------------------------------------------------------------------------------|
| Ziad Nehme        | Long-Term Trends in the Incidence and Outcome of Refractory and Non-Refractory Ventricular Fibrillation Cardiac Arrest                                                         |
| Norihiro Nishioka | Early Prediction of Neurological Outcome at 30 Days After Return of Spontaneous Circulation From Out-of-Hospital Cardiac Arrest                                                |
| Masashi Okubo     | Association of Intra-Arrest Transport versus Continued On-scene Resuscitation with Survival to Hospital Discharge Among Pediatric Patients with Out-of-Hospital Cardiac Arrest |
| Matthew Potter    | Cognitive and Psychological Outcomes of Patients 6 Months After Cardiac Arrest or Intensive Care Stay                                                                          |
| Hogul Song        | Variance of the Intracranial Pressure Over Time and Relationship With Neurologic Prognosis in Cardiac Arrest Survivors Who Underwent Targeted Temperature Management           |
| Kazuya Tateishi   | Impact of the Number of Prehospital Defibrillation Attempts on Neurologically Intact Survival in Patients With Out-of-Hospital Cardiac Arrest and Shockable Rhythm             |
| Andy Tran         | A Risk-Adjustment Model for Patients Presenting to Hospitals with Out-of-Hospital Cardiac Arrest and ST-Elevation Myocardial Infarction                                        |
